# Supplementary material
Source: Springer Nature journal article supplement (https://www.springermedizin.de/resource/supplementary/12957_2011_920_MOESM4_ESM.pdf/9561578)
Supplement: MOESM4 [file 9561578]

Table 3. Summary of patient outcomes

| No. | Age (yrs) | BaselinePSA (ng/ml) | Gleason score | Clinical stage | Preoperative PSA (ng/ml) | Pathological stage | Surgical margin | Pathological change | PSA progression |
|-----|-----------|---------------------|---------------|----------------|--------------------------|--------------------|-----------------|---------------------|-----------------|
| 1   | 58        | 17.0                | 7             | T2aN0          | 0.083                    | T2bN0              | negative        | 2                   | No              |
| 2   | 68        | 21.5                | 7             | T1cN0          | 0.078                    | T2bN0              | negative        | 2                   | No              |
| 3   | 69        | 15.0                | 9             | T2aN0          | 0.045                    | T2aN0              | negative        | 2                   | No              |
| 4   | 69        | 23.4                | 6             | T3aN0          | 0.143                    | T2bN0              | negative        | 2                   | No              |
| 5   | 67        | 42.9                | 9             | T3aN0          | 0.133                    | T2bN0              | negative        | 2                   | No              |
| 6   | 67        | 5.1                 | 10            | T1bN0          | 0.002                    | T0N0               | negative        | 3b                  | No              |
| 7   | 57        | 35.9                | 9             | T3aN1          | 0.056                    | T3bN1              | negative        | 1                   | 6               |
| 8   | 64        | 28.3                | 9             | T3aN0          | 0.084                    | T2bN0              | negative        | 2                   | No              |
| 9   | 58        | 45.1                | 8             | T3aN1          | 0.071                    | T3bN1              | negative        | 2                   | No              |
| 10  | 66        | 37.8                | 7             | T3bN0          | 0.11                     | T3bN1              | negative        | 1                   | 6               |
| 11  | 58        | 61.2                | 10            | T4N0           | 0.52                     | T4N1               | negative        | 1                   | 7               |
| 12  | 62        | 30.7                | 5             | T1cN0          | 0.498                    | T2aN0              | negative        | 2                   | No              |
| 13  | 67        | 77.0                | 10            | T2bN0          | 0.335                    | T3bN0              | negative        | 1                   | 6               |
| 14  | 67        | 21.4                | 9             | T2bN0          | 0.132                    | T2bN0              | negative        | 2                   | No              |
| 15  | 63        | 5.4                 | 9             | T2aN0          | 0.132                    | T2aN0              | negative        | 1                   | No              |
| 16  | 68        | 17.3                | 9             | T2cN0          | 0.036                    | T0N0               | negative        | 3b                  | No              |
| 17  | 71        | 25.3                | 7             | T1cN0          | 0.017                    | T2aN0              | negative        | 2                   | No              |
| 18  | 67        | 79.8                | 9             | T1cN0          | 0.932                    | T2bN0              | negative        | 0b                  | No              |
